# Supplementary material for: Quantifying the Evolution of Vascular Barrier Disruption in Advanced Atherosclerosis with Semipermeant Nanoparticle Contrast Agents
Source: PubMed Central journal article supplement (PMC3196552; doi:10.1371/journal.pone.0026385), 2011-10-18

Figure S2

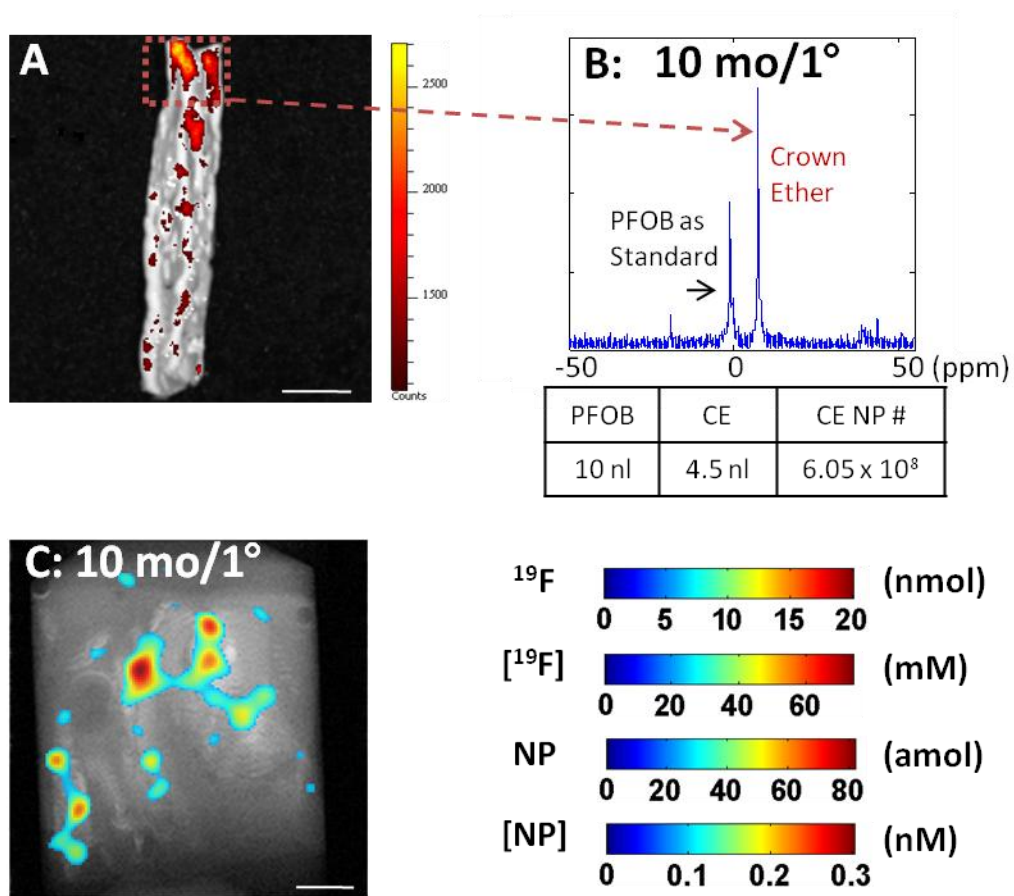

Supplement: pone.0026385.s002.pdf [file pone.0026385.s002.pdf]
