# Supplementary material for: Quantifying the Evolution of Vascular Barrier Disruption in Advanced Atherosclerosis with Semipermeant Nanoparticle Contrast Agents
Source: PubMed Central journal article supplement (PMC3196552; doi:10.1371/journal.pone.0026385), 2011-10-18
Supplement: pone.0026385.s005.pdf [file pone.0026385.s005.pdf]

**Figure S5**

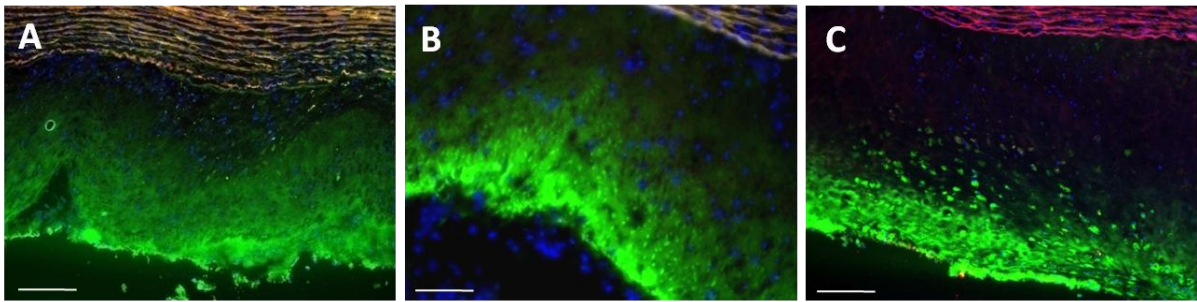

53 nm beads

250 nm NP

2 um beads
