# Supplementary material for: Quantifying the Evolution of Vascular Barrier Disruption in Advanced Atherosclerosis with Semipermeant Nanoparticle Contrast Agents
Source: PubMed Central journal article supplement (PMC3196552; doi:10.1371/journal.pone.0026385), 2011-10-18
Supplement: pone.0026385.s006.pdf [file pone.0026385.s006.pdf]

**Table S1**

| In vivo | diet   | rabbits |
|---------|--------|---------|
|         | 0M     | 2       |
|         | 3-5M   | 7       |
|         | 6-9M   | 6       |
|         | 12-14M | 6       |
| total   |        | 20      |

| Ex vivo | diet   | rabbits | sections | Fluor-NP | plain-NP | Beads |
|---------|--------|---------|----------|----------|----------|-------|
|         | 0M     | 1       | 4        | 4        |          |       |
|         | 3-5M   | 1       | 4        | 4        |          |       |
|         | 6-9M   | 2       | 12       | 11       | 1        |       |
|         | 12-14M | 6       | 25       | 11       | 3        | 11    |
| total   |        | 10      | 45       | 30       | 4        | 11    |
